# Supplementary material for: Occupational Exposures Associated with Life Expectancy without and with Disability
Source: MDPI journal article supplement (doi:10.3390/ijerph17176377), 2020-09-01
Supplement: s1 [file s1]

*Supplementary Material:*

**Table S1.** Total life expectancy, and life expectancy without and with disability in association with occupational exposure of the workers at the age of 55 years for low, intermediate and high educational level [95% CI=95% confidence interval].

| Low educational level (n=761) |                                         |                                                      | Intermediate educational level (n=392)            |                                         |                                                      | High educational level (n=210)                    |                                         |                                                      |                                                   |
|-------------------------------|-----------------------------------------|------------------------------------------------------|---------------------------------------------------|-----------------------------------------|------------------------------------------------------|---------------------------------------------------|-----------------------------------------|------------------------------------------------------|---------------------------------------------------|
|                               | Total life expectancy in years (95% CI) | Life expectancy without disability in years (95% CI) | Life expectancy with disability in years (95% CI) | Total life expectancy in years (95% CI) | Life expectancy without disability in years (95% CI) | Life expectancy with disability in years (95% CI) | Total life expectancy in years (95% CI) | Life expectancy without disability in years (95% CI) | Life expectancy with disability in years (95% CI) |
| Overall                       | 22.40<br>(21.18, 23.31)                 | 10.27<br>(9.66, 10.93)                               | 12.13<br>(11.01, 12.86)                           | 23.43<br>(22.69, 23.96)                 | 11.79<br>(11.22, 12.22)                              | 11.64<br>(11.11, 12.19)                           | 24.54<br>(23.42, 25.32)                 | 13.40<br>(12.75, 13.98)                              | 11.14<br>(10.18, 11.81)                           |
| Physical work demands         |                                         |                                                      |                                                   |                                         |                                                      |                                                   |                                         |                                                      |                                                   |
| Repetitive movements          |                                         |                                                      |                                                   |                                         |                                                      |                                                   |                                         |                                                      |                                                   |
| Low                           | 22.85<br>(20.29, 24.66)                 | 10.49<br>(9.55, 11.70)                               | 12.37<br>(10.51, 13.75)                           | 23.79<br>(21.79, 24.98)                 | 11.96<br>(10.94, 12.82)                              | 11.83<br>(10.42, 12.81)                           | 24.81<br>(23.11, 26.18)                 | 13.51<br>(12.54, 14.43)                              | 11.29<br>(10.15, 12.31)                           |
| High                          | 22.45<br>(21.28, 23.32)                 | 10.31<br>(9.55, 11.09)                               | 12.13<br>(11.07, 12.88)                           | 23.36<br>(22.52, 23.95)                 | 11.76<br>(11.07, 12.29)                              | 11.59<br>(10.97, 12.17)                           | 24.34<br>(23.27, 25.26)                 | 13.30<br>(12.45, 14.05)                              | 11.04<br>(10.04, 12.04)                           |
| Use force                     |                                         |                                                      |                                                   |                                         |                                                      |                                                   |                                         |                                                      |                                                   |
| Low                           | 23.08<br>(20.57, 24.36)                 | 10.77<br>(9.81, 11.43)                               | 12.31<br>(10.24, 13.82)                           | 23.72<br>(22.48, 24.45)                 | 12.08<br>(11.53, 12.70)                              | 11.63<br>(10.73, 12.29)                           | 24.37<br>(22.96, 25.40)                 | 13.42<br>(12.55, 14.11)                              | 10.94<br>(9.84, 11.82)                            |
| High                          | 22.76<br>(21.03, 23.25)                 | 10.31<br>(9.37, 10.86)                               | 12.45<br>(11.14, 13.07)                           | 23.56<br>(21.98, 24.16)                 | 11.68<br>(10.91, 12.25)                              | 11.88<br>(10.65, 12.45)                           | 24.38<br>(22.63, 25.51)                 | 13.09<br>(12.10, 13.80)                              | 11.29<br>(9.79, 12.21)                            |
| Uncomfortable position        |                                         |                                                      |                                                   |                                         |                                                      |                                                   |                                         |                                                      |                                                   |
| Low                           | 23.21<br>(20.93, 24.51)                 | 10.64<br>(9.48, 11.54)                               | 12.57<br>(11.03, 13.42)                           | 23.84<br>(22.86, 24.74)                 | 12.11<br>(11.46, 12.71)                              | 11.74<br>(11.00, 12.68)                           | 24.46<br>(23.27, 25.38)                 | 13.59<br>(12.66, 14.29)                              | 10.87<br>(10.05, 11.62)                           |
| High                          | 22.57<br>(20.33, 23.31)                 | 10.20<br>(9.37, 10.84)                               | 12.36<br>(10.81, 13.13)                           | 23.29<br>(22.14, 23.97)                 | 11.68<br>(11.05, 12.39)                              | 11.61<br>(10.64, 12.13)                           | 24.03<br>(22.39, 24.94)                 | 13.20<br>(12.03, 14.24)                              | 10.82<br>(9.48, 11.52)                            |
| Psychosocial work demands     |                                         |                                                      |                                                   |                                         |                                                      |                                                   |                                         |                                                      |                                                   |
| Cognitive demands             |                                         |                                                      |                                                   |                                         |                                                      |                                                   |                                         |                                                      |                                                   |
| Low                           | 22.52<br>(21.35, 23.33)                 | 10.32<br>(9.66, 10.93)                               | 12.20<br>(11.09, 13.00)                           | 23.37<br>(22.42, 23.99)                 | 11.71<br>(11.06, 12.28)                              | 11.66<br>(10.98, 12.26)                           | 24.29<br>(22.87, 25.34)                 | 13.17<br>(12.16, 13.92)                              | 11.12<br>(9.95, 12.02)                            |
| High                          | 22.32<br>(18.00, 23.96)                 | 10.29<br>(8.69, 11.32)                               | 12.03<br>(9.18, 13.48)                            | 23.22<br>(21.36, 24.45)                 | 11.69<br>(10.50, 12.56)                              | 11.53<br>(10.30, 12.65)                           | 24.19<br>(22.79, 25.50)                 | 13.17<br>(12.06, 14.19)                              | 11.03<br>(9.75, 12.19)                            |
| Task requirements             |                                         |                                                      |                                                   |                                         |                                                      |                                                   |                                         |                                                      |                                                   |

| Low educational level (n=761) |                                         |                                                      | Intermediate educational level (n=392)            |                                         |                                                      | High educational level (n=210)                    |                                         |                                                      |                                                   |
|-------------------------------|-----------------------------------------|------------------------------------------------------|---------------------------------------------------|-----------------------------------------|------------------------------------------------------|---------------------------------------------------|-----------------------------------------|------------------------------------------------------|---------------------------------------------------|
|                               | Total life expectancy in years (95% CI) | Life expectancy without disability in years (95% CI) | Life expectancy with disability in years (95% CI) | Total life expectancy in years (95% CI) | Life expectancy without disability in years (95% CI) | Life expectancy with disability in years (95% CI) | Total life expectancy in years (95% CI) | Life expectancy without disability in years (95% CI) | Life expectancy with disability in years (95% CI) |
| Low                           | 22.45<br>(21.09, 23.43)                 | 10.32<br>(9.72, 10.94)                               | 12.12<br>(11.05, 12.89)                           | 23.32<br>(22.35, 23.85)                 | 11.61<br>(11.00, 12.07)                              | 11.71<br>(11.04, 12.14)                           | 24.23<br>(22.57, 25.09)                 | 12.94<br>(11.97, 13.68)                              | 11.29<br>(10.20, 12.25)                           |
| High                          | 22.48<br>(17.67, 24.41)                 | 11.03<br>(8.69, 12.39)                               | 11.45<br>(8.69, 13.00)                            | 23.49<br>(21.21, 25.01)                 | 12.39<br>(11.22, 13.55)                              | 11.10<br>(9.21, 12.42)                            | 24.55<br>(22.59, 25.50)                 | 13.81<br>(12.71, 14.56)                              | 10.74<br>(9.47, 11.49)                            |
| Time pressure                 |                                         |                                                      |                                                   |                                         |                                                      |                                                   |                                         |                                                      |                                                   |
| Low                           | 22.83<br>(21.58, 23.55)                 | 10.41<br>(9.71, 10.97)                               | 12.42<br>(11.51, 13.09)                           | 23.46<br>(22.61, 24.16)                 | 11.75<br>(11.21, 12.32)                              | 11.71<br>(10.90, 12.43)                           | 24.14<br>(23.08, 25.07)                 | 13.13<br>(12.29, 13.93)                              | 11.00<br>(10.15, 11.98)                           |
| High                          | 22.85<br>(18.57, 24.72)                 | 10.93<br>(9.07, 12.50)                               | 11.92<br>(9.56, 13.53)                            | 23.42<br>(20.83, 24.64)                 | 12.24<br>(10.81, 13.12)                              | 11.18<br>(9.71, 12.38)                            | 24.04<br>(22.45, 25.28)                 | 13.58<br>(12.45, 14.43)                              | 10.46<br>(9.34, 11.48)                            |
| Psychosocial work resources   |                                         |                                                      |                                                   |                                         |                                                      |                                                   |                                         |                                                      |                                                   |
| Variation in activities       |                                         |                                                      |                                                   |                                         |                                                      |                                                   |                                         |                                                      |                                                   |
| Low                           | 22.47<br>(21.29, 23.15)                 | 10.22<br>(9.37, 10.80)                               | 12.25<br>(11.24, 12.92)                           | 23.28<br>(22.75, 23.93)                 | 11.60<br>(11.05, 12.25)                              | 11.69<br>(11.10, 12.20)                           | 24.17<br>(23.10, 25.00)                 | 13.05<br>(12.24, 13.93)                              | 11.12<br>(10.07, 11.98)                           |
| High                          | 23.34<br>(20.54, 25.30)                 | 11.19<br>(9.91, 12.47)                               | 12.15<br>(9.67, 13.89)                            | 24.19<br>(22.53, 25.47)                 | 12.62<br>(11.30, 13.44)                              | 11.58<br>(10.43, 13.12)                           | 25.11<br>(23.38, 26.06)                 | 14.11<br>(12.94, 15.04)                              | 11.00<br>(9.88, 11.89)                            |
| Autonomy                      |                                         |                                                      |                                                   |                                         |                                                      |                                                   |                                         |                                                      |                                                   |
| Low                           | 22.94<br>(21.54, 23.89)                 | 10.00<br>(9.43, 10.61)                               | 12.94<br>(11.77, 14.00)                           | 23.88<br>(22.88, 24.56)                 | 11.28<br>(10.64, 11.81)                              | 12.60<br>(11.88, 13.36)                           | 24.84<br>(23.45, 25.91)                 | 12.60<br>(11.75, 13.68)                              | 12.23<br>(11.20, 12.99)                           |
| High                          | 21.91<br>(19.70, 22.82)                 | 11.03<br>(9.69, 11.92)                               | 10.88<br>(9.50, 11.92)                            | 22.85<br>(21.48, 23.63)                 | 12.31<br>(11.44, 13.18)                              | 10.54<br>(9.59, 11.17)                            | 23.80<br>(22.31, 24.75)                 | 13.63<br>(12.68, 14.37)                              | 10.16<br>(9.09, 11.08)                            |
